# Supplementary material
Source: PubMed Central journal article supplement (PMC8873622)
Supplement: mmc1.pdf [file mmc1.pdf]

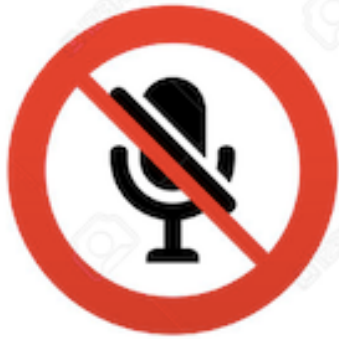

**your mic  
isn't working**

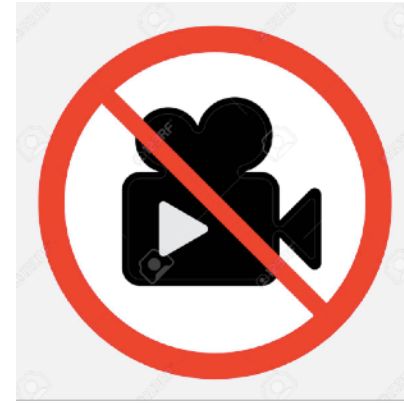

**video is frozen**

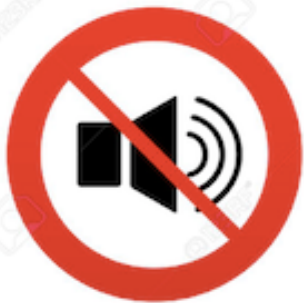

**sound  
problem**

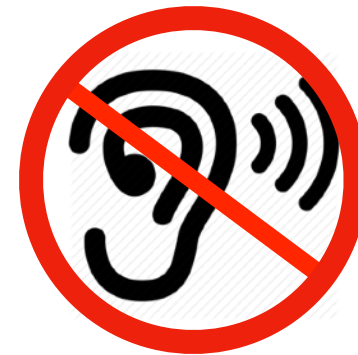

**I can't  
hear you**

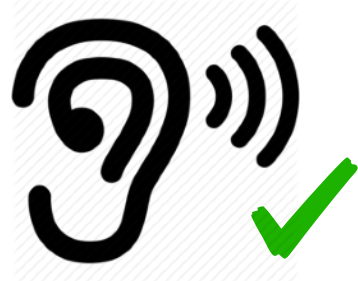

**I hear you,  
do you  
hear me?**

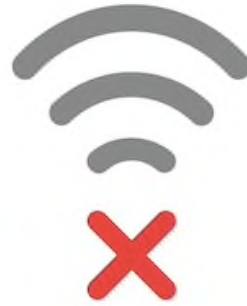

**poor  
signal**

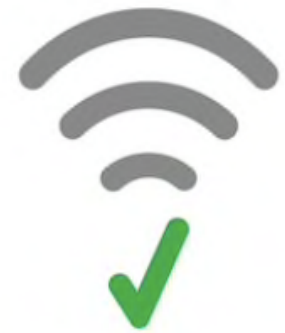

**good  
signal**

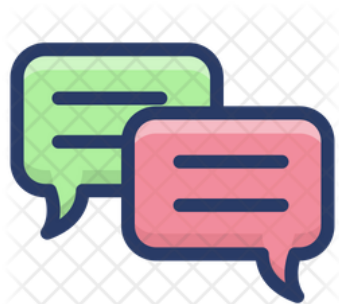

**I will send a  
text or email  
right now**

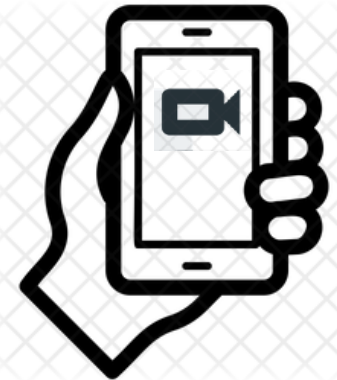

**switching to my  
phone's video**

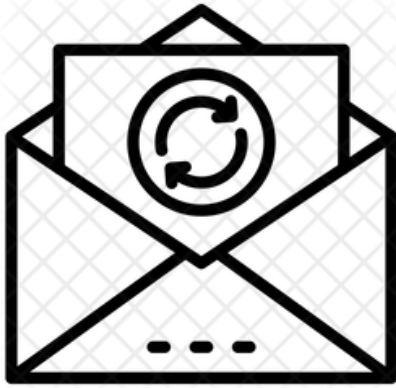

**restart from  
link in your  
invitation**

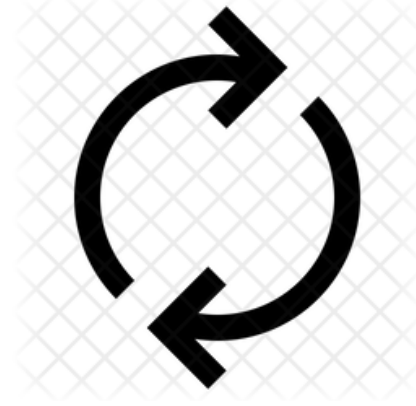

**let's restart  
the meeting**

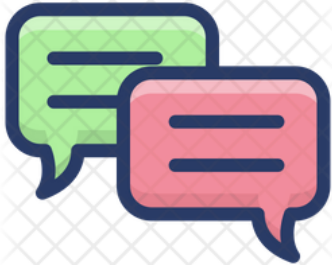

**check the  
live chat**

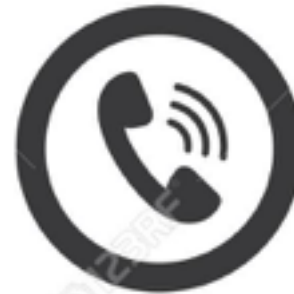

**let's switch  
to phone call**
